# Supplementary material
Source: Springer Nature journal article supplement (https://www.springermedizin.de/resource/supplementary/12889_2010_2748_MOESM1_ESM.pdf/9488060)
Supplement: MOESM1 [file 9488060]

Child and Family Health Nurses visit mothers at home for first post birth check.  
and take consent

Agree

Enrolled in the study

Phone interview when child is 4 months

Teething ring and an advice leaflet at 6 months

Phone interview when child is 8 months

Phone interview, sipper cup, advice leaflet and birthday card  
at 12 months

Phone interview, 3 tubes toothpaste, toothbrush, advice leaflet  
at 18 months

Clinical examination at age 2 years

Phone interview, 3 tubes toothpaste, toothbrush, advice leaflet  
at 30, 36, 42, 48, 54, 60 months

Clinical examination at age 5 years

Disagree

Do not participate in the study
